# Supplementary material for: Distribution, abundance and ecogenomics of the cosmopolitan Gemmatimonadota group PAUC43f
Source: Research Square preprint supplement (doi:10.21203/rs.3.rs-1666545/v1), 2022-05-23
Supplement: Supplementary file 1 [file d8905c552f45bc7fb1680a94.xlsx]

## Sheet: Hoja1
Bin ID	Biosample	Origin	Host	Geographic_location	Country	MAG sequences available in:
IRC1_bin_13	SAMN15855206	Sponge	Ircinia ramosa	18.832467 S 147.633250 E	Australia	https://data.ace.uq.edu.au/public/sponge_mags/
IRC2_bin_12	SAMN15855242	Sponge	Ircinia ramosa	18.832467 S 147.633250 E	Australia	https://data.ace.uq.edu.au/public/sponge_mags/
IRC3_bin_28	SAMN15855273	Sponge	Ircinia ramosa	18.832467 S 147.633250 E	Australia	https://data.ace.uq.edu.au/public/sponge_mags/
IRC4_bin_13	SAMN15855296	Sponge	Ircinia ramosa	18.832467 S 147.633250 E	Australia	https://data.ace.uq.edu.au/public/sponge_mags/
RHO1_bin_50	SAMN15855388	Sponge	Rhopaloides odorabile	18.763498 S 146.519327 E	Australia	https://data.ace.uq.edu.au/public/sponge_mags/
RHO2_bin_49	SAMN15855477	Sponge	Rhopaloides odorabile	18.763498 S 146.519327 E	Australia	https://data.ace.uq.edu.au/public/sponge_mags/
RHO3_bin_38	SAMN15855548	Sponge	Rhopaloides odorabile	18.763498 S 146.519327 E	Australia	https://data.ace.uq.edu.au/public/sponge_mags/
VXMQ01000000	SAMN12598219	Sponge	Ircinia ramosa	18.49 S 147.38 E	Australia	https://data.ace.uq.edu.au/public/sponge_mags/
VXMR01000000	SAMN12598220	Sponge	Ircinia ramosa	18.49 S 147.38 E	Australia	https://data.ace.uq.edu.au/public/sponge_mags/
VXOJ01000000	SAMN12598264	Sponge	Ircinia ramosa	18.49 S 147.38 E	Australia	https://data.ace.uq.edu.au/public/sponge_mags/
VXQX01000000	SAMN12598330	Sponge	Ircinia ramosa	18.49 S 147.38 E	Australia	https://data.ace.uq.edu.au/public/sponge_mags/
VXSM01000000	SAMN12598371	Sponge	Ircinia ramosa	18.49 S 147.38 E	Australia	https://data.ace.uq.edu.au/public/sponge_mags/
VXWG01000000	SAMN12598469	Sponge	Ircinia ramosa	18.49 S 147.38 E	Australia	https://data.ace.uq.edu.au/public/sponge_mags/
VXXU01000000	SAMN12598509	Sponge	Ircinia ramosa	18.49 S 147.38 E	Australia	https://data.ace.uq.edu.au/public/sponge_mags/
VXYT01000000	SAMN12598534	Sponge	Ircinia ramosa	18.49 S 147.38 E	Australia	https://data.ace.uq.edu.au/public/sponge_mags/
VYCV01000000	SAMN12598640	Sponge	Ircinia ramosa	18.49 S 147.38 E	Australia	https://data.ace.uq.edu.au/public/sponge_mags/
VYDQ01000000	SAMN12598661	Sponge	Ircinia ramosa	18.49 S 147.38 E	Australia	https://data.ace.uq.edu.au/public/sponge_mags/
VYFI01000000	SAMN12598705	Sponge	Ircinia ramosa	18.49 S 147.38 E	Australia	https://data.ace.uq.edu.au/public/sponge_mags/
3300025550	Gb0101342	Marine sediment	-	38.20 N 122.01 W	United States	https://portal.nersc.gov/GEM/
3300025554	Gb0101343	Marine sediment	-	38.20 N 122.01 W	United States	https://portal.nersc.gov/GEM/
3300026122	Gb0124993	Soil	-	37.5 N 122.13 W	United States	https://portal.nersc.gov/GEM/
3300026127	Gb0124994	Soil	-	37.5 N 122.13 W	United States	https://portal.nersc.gov/GEM/
3300026196	Gb0124995	Soil	-	37.5 N 122.13 W	United States	https://portal.nersc.gov/GEM/
3300027962	Gb0053374	Marine sediment	-	17.95 N 67.19 W	Puerto Rico	https://portal.nersc.gov/GEM/
Bin_M15_27	SAMN28450406	Marine sediment	-	37.666518 N 0.813933 W	Spain	NCBI BioProject: PRJNA838580
Bin_S15_23	SAMN28450407	Marine sediment	-	37.666518 N 0.813933 W	Spain	NCBI BioProject: PRJNA838580
Bin_M162_005	SAMN28450408	Marine sediment	-	37.666518 N 0.813933 W	Spain	NCBI BioProject: PRJNA838580
Bin_M182_011	SAMN28450409	Marine sediment	-	37.666518 N 0.813933 W	Spain	NCBI BioProject: PRJNA838580
Bin_M42_016	SAMN28450410	Marine sediment	-	37.666518 N 0.813933 W	Spain	NCBI BioProject: PRJNA838580
Bin_M51_014	SAMN28450411	Marine sediment	-	37.666518 N 0.813933 W	Spain	NCBI BioProject: PRJNA838580
Bin_M92_019	SAMN28450412	Marine sediment	-	37.666518 N 0.813933 W	Spain	NCBI BioProject: PRJNA838580
Bin_S162_005	SAMN28450413	Marine sediment	-	37.666518 N 0.813933 W	Spain	NCBI BioProject: PRJNA838580
Bin_S162_007	SAMN28450414	Marine sediment	-	37.666518 N 0.813933 W	Spain	NCBI BioProject: PRJNA838580
Bin_S182_010	SAMN28450415	Marine sediment	-	37.666518 N 0.813933 W	Spain	NCBI BioProject: PRJNA838580
Bin_S212_14	SAMN28450416	Marine sediment	-	37.666518 N 0.813933 W	Spain	NCBI BioProject: PRJNA838580
Bin_S43_010	SAMN28450417	Marine sediment	-	37.666518 N 0.813933 W	Spain	NCBI BioProject: PRJNA838580
Bin_S43_056	SAMN28450418	Marine sediment	-	37.666518 N 0.813933 W	Spain	NCBI BioProject: PRJNA838580
Bin_S53_006	SAMN28450419	Marine sediment	-	37.666518 N 0.813933 W	Spain	NCBI BioProject: PRJNA838580
Bin_S91_007	SAMN28450420	Marine sediment	-	37.666518 N 0.813933 W	Spain	NCBI BioProject: PRJNA838580
