# Supplementary material for: Distribution, abundance and ecogenomics of the cosmopolitan Gemmatimonadota group PAUC43f
Source: Research Square preprint supplement (doi:10.21203/rs.3.rs-1666545/v1), 2022-05-23
Supplement: Supplementary file 2 [file e2d66b280115791ba39a044d.xlsx]

## Sheet: Hoja1
Bin	Type	Most similar known cluster	Similarity
3300025550_6	Terpene	Isorenieratene	0.25
3300025554_5	β-lactone	-	-
	Terpene	Isorenieratene	0.25
3300026122_2	β-lactone	-	-
3300026127_2	β-lactone	-	-
3300026196_11	β-lactone	-	-
3300027962_15	β-lactone	-	-
Bin_M15	Terpene	Nocamycin	0.07
	Terpene	Carotenoid	1
Bin_S15	Terpene	-	-
	Terpene	Carotenoid	1
Bin_M162_005	Terpene	Carotenoid	1
Bin_M182_011	Terpene	Carotenoid	1
Bin_M42_016	Terpene	Carotenoid	0.18
Bin_M51_014	Terpene	Carotenoid	1
Bin_M92_019	Terpene	Carotenoid	0.18
	Terpene	Carotenoid	1
Bin_S162_005	Terpene	Carotenoid	1
Bin_S182_010	Terpene	Carotenoid	1
Bin_S212_14	Terpene	Carotenoid	1
Bin_S43_010	Terpene	Carotenoid	1
Bin_S53_006	Clusters not found
Bin_S91_007	Terpene	Carotenoid	1
Bin_S43_056	Lassopeptide	-	-
Bin_S162_007	Terpene	-	-
	β-lactone	-	-
IRC1_bin_13	RiPP-like	-	-
	β-lactone	-	-
	Ranthipeptide	-	-
	Terpene	-	-
	T1PKS	Funisamine	0.05
	T1PKS	Vazabitide A	0.04
IRC2_bin_12	T1PKS	-	-
	T1PKS	-	-
	T1PKS	Vazabitide A	0.04
	Terpene	-	-
	RiPP-like	-	-
	Ranthipeptide	-	-
	β-lactone	-	-
IRC3_bin_28	T1PKS	-	-
	T1PKS	-	-
	T1PKS	Vazabitide A	0.04
	Terpene	-	-
	Terpene	Toyocamycin/sangivamycin	0.16
	Ranthipeptide	-	-
	RiPP-like	-	-
	β-lactone	-	-
IRC4_bin_13	T1PKS	-	-
	T1PKS	Azinomycin B	0.04
	β-lactone	-	-
	Ranthipeptide	-	-
	Terpene	-	-
RHO1_bin_50	T1PKS	-	-
	T1PKS	Vazabitide A	0.04
	β-lactone	-	-
	RiPP-like	-	-
	Terpene	-	-
RHO2_bin_49	T1PKS	-	-
	T1PKS	Vazabitide A	0.04
	β-lactone	-	-
	Ranthipeptide	-	-
RHO3_bin_38	T1PKS	-	-
	T1PKS	Azinomycin B	0.04
	β-lactone	-	-
	RiPP-like	-	-
	Ranthipeptide	-	-
	Terpene	-	-
VXMQ01000000	T1PKS	-	-
	T1PKS	Vazabitide A	0.04
	β-lactone	-	-
	RiPP-like	-	-
	Ranthipeptide	-	-
	Terpene	-	-
VXMR01000000	T1PKS	-	-
	T1PKS	Vazabitide A	0.04
	β-lactone	-	-
	Ranthipeptide	-	-
	Terpene	-	-
	Terpene	Toyocamycin/sangivamycin	0.16
VXOJ01000000	T1PKS	-	-
	T1PKS	Azinomycin B	0.04
	Ranthipeptide	-	-
	β-lactone	-	-
	RiPP-like	-	-
VXQX01000000	T1PKS	-	-
	T1PKS	Azinomycin B	0.04
	β-lactone	-	-
	Ranthipeptide	-	-
	Terpene	-	-
	RiPP-like	-	-
VXSM01000000	T1PKS	Vazabitide A	0.04
	T1PKS	Funisamine	0.05
	β-lactone	-	-
	Terpene	-	-
	Terpene	-	-
	Ranthipeptide	-	-
	RiPP-like	-	-
VXWG01000000	T1PKS	-	-
	T1PKS	Azinomycin B	0.04
	β-lactone	-	-
	Terpene	-	-
	Ranthipeptide	-	-
	RiPP-like	-	-
VXXU01000000	T1PKS	-	-
	T1PKS	-	-
	T1PKS	-	-
	T1PKS	Cyphomycin	0.02
	Terpene	-	-
	Terpene	-	-
	RiPP-like	-	-
	RiPP-like	-	-
VXYT01000000	T1PKS	-	-
	T1PKS	-	-
	T1PKS	Azinomycin B	0.04
	β-lactone	-	-
	Terpene	-	-
	Ranthipeptide	-	-
	RiPP-like	-	-
VYCV01000000	T1PKS	-	-
	T1PKS	-	-
	T1PKS	-	-
	T1PKS	-	-
	β-lactone	-	-
	Terpene	-	-
	Terpene	-	-
	Ranthipeptide	-	-
	RiPP-like	-	-
VYDQ01000000	T1PKS	-	-
	T1PKS	-	-
	T1PKS	Azinomycin B	0.04
	β-lactone	-	-
	Terpene	-	-
	Ranthipeptide	-	-
	RiPP-like	-	-
VYFI01000000	T1PKS	-	-
	T1PKS	-	-
	T1PKS	Vazabitide A	0.04
	β-lactone	-	-
	Terpene	-	-
	Terpene	-	-
	RiPP-like	-	-
